# Supplementary material for: Revision of the World Species of Megaphragma Timberlake (Hymenoptera: Trichogrammatidae)
Source: MDPI journal article supplement (doi:10.3390/insects13060561), 2022-06-20
Supplement: s1 [file s1]

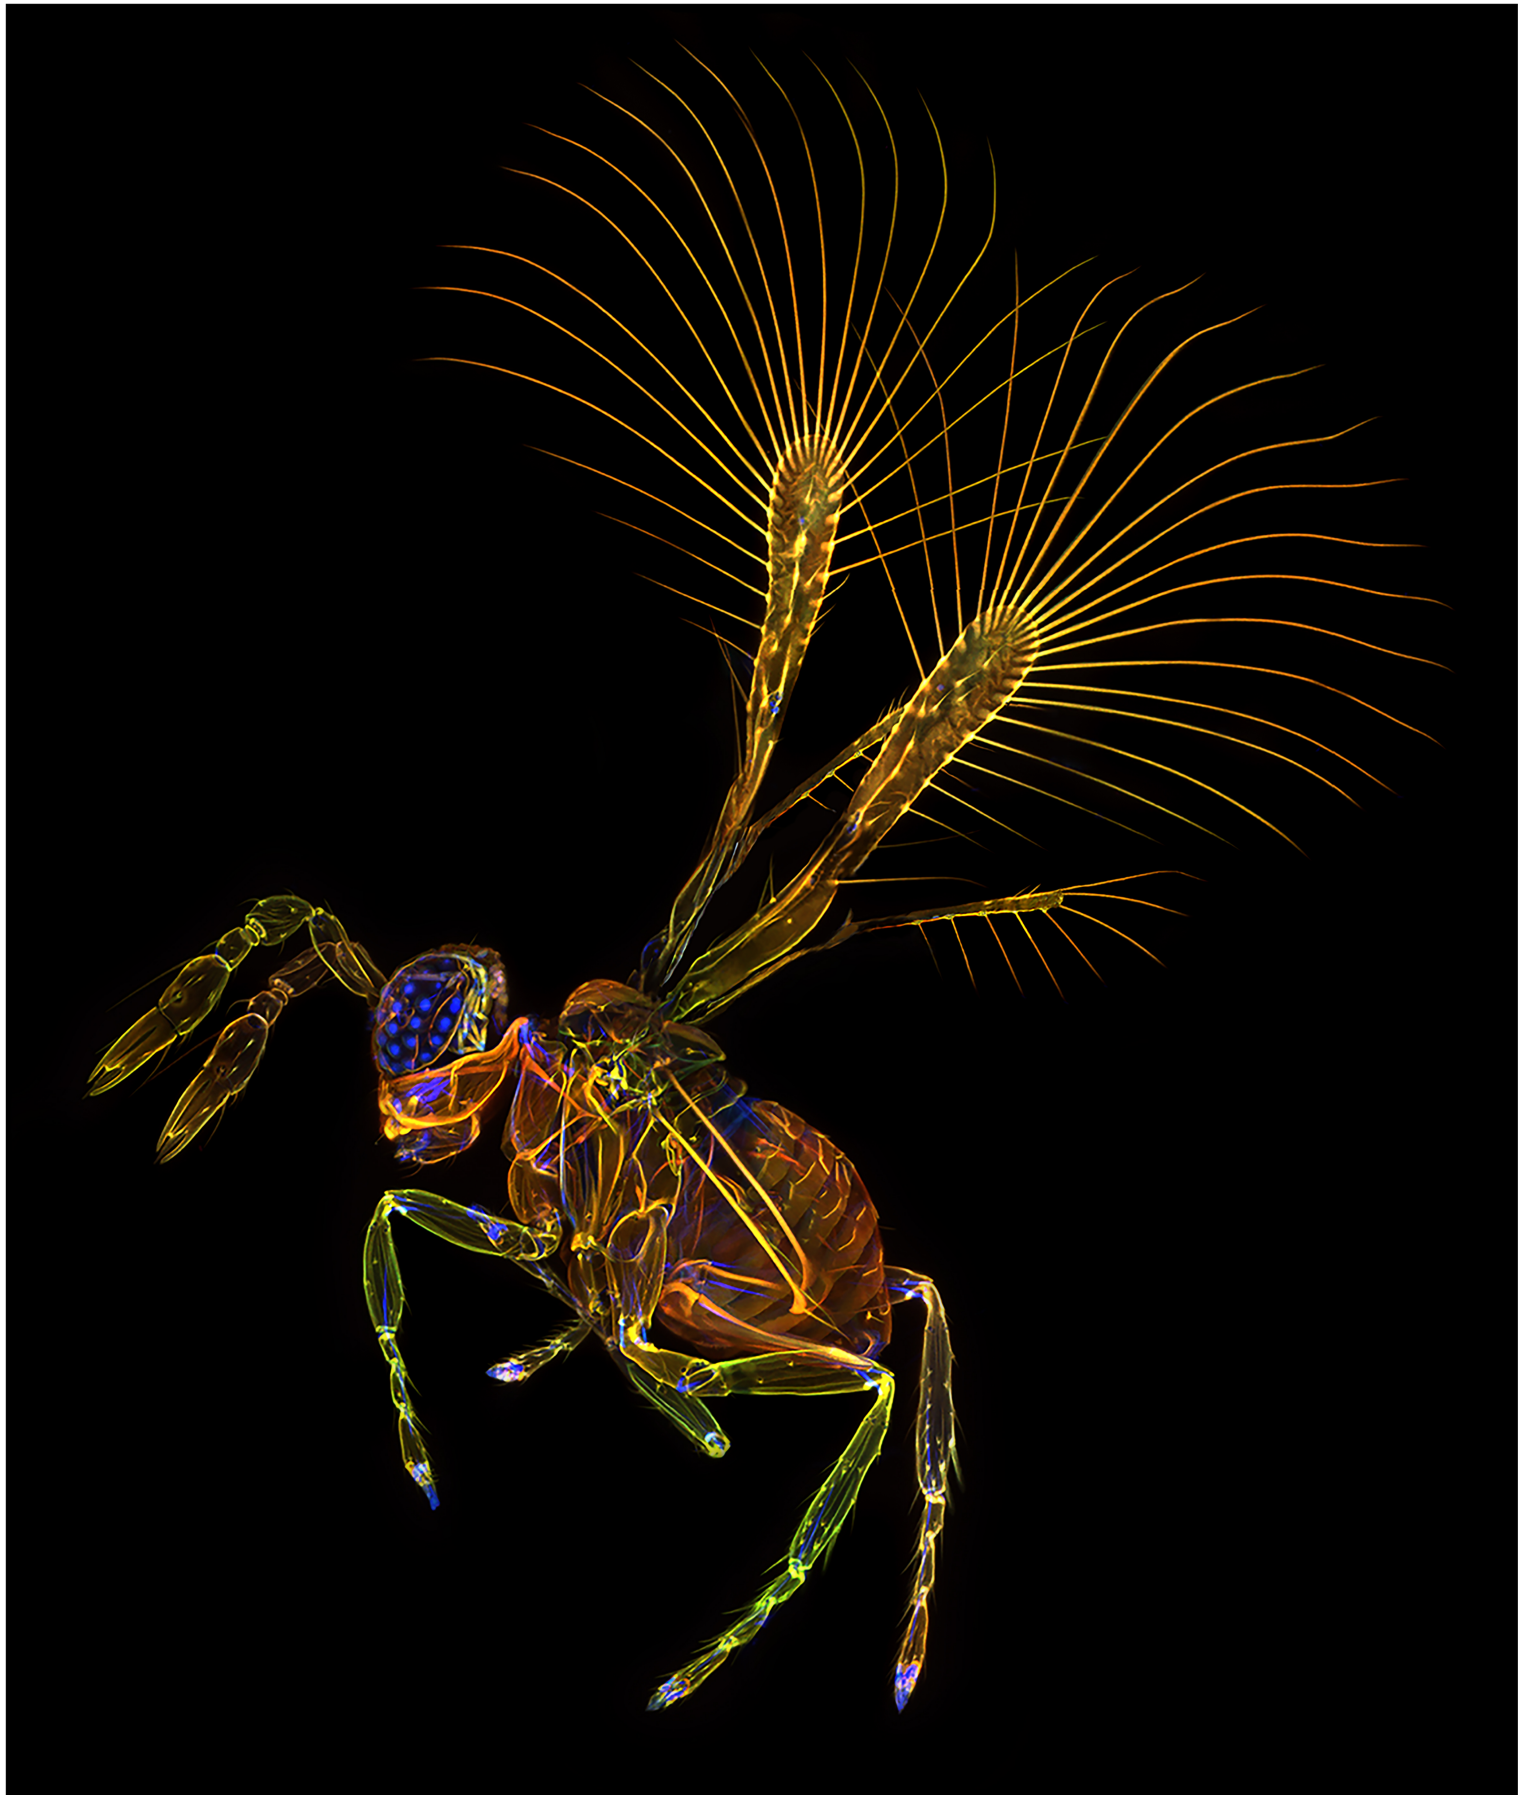

**Figure S1.** Confocal laser micrograph of *Megaphragma longiciliatum* (female from Oman). Blue areas are the least sclerotised and yellow the most strongly sclerotized (Photo A. Polaszek).

**Figure S2.** Phylogenetic tree of CO1 in ***Megaphragma***, unpartitioned analysis in RAxML-NG, GTR model.

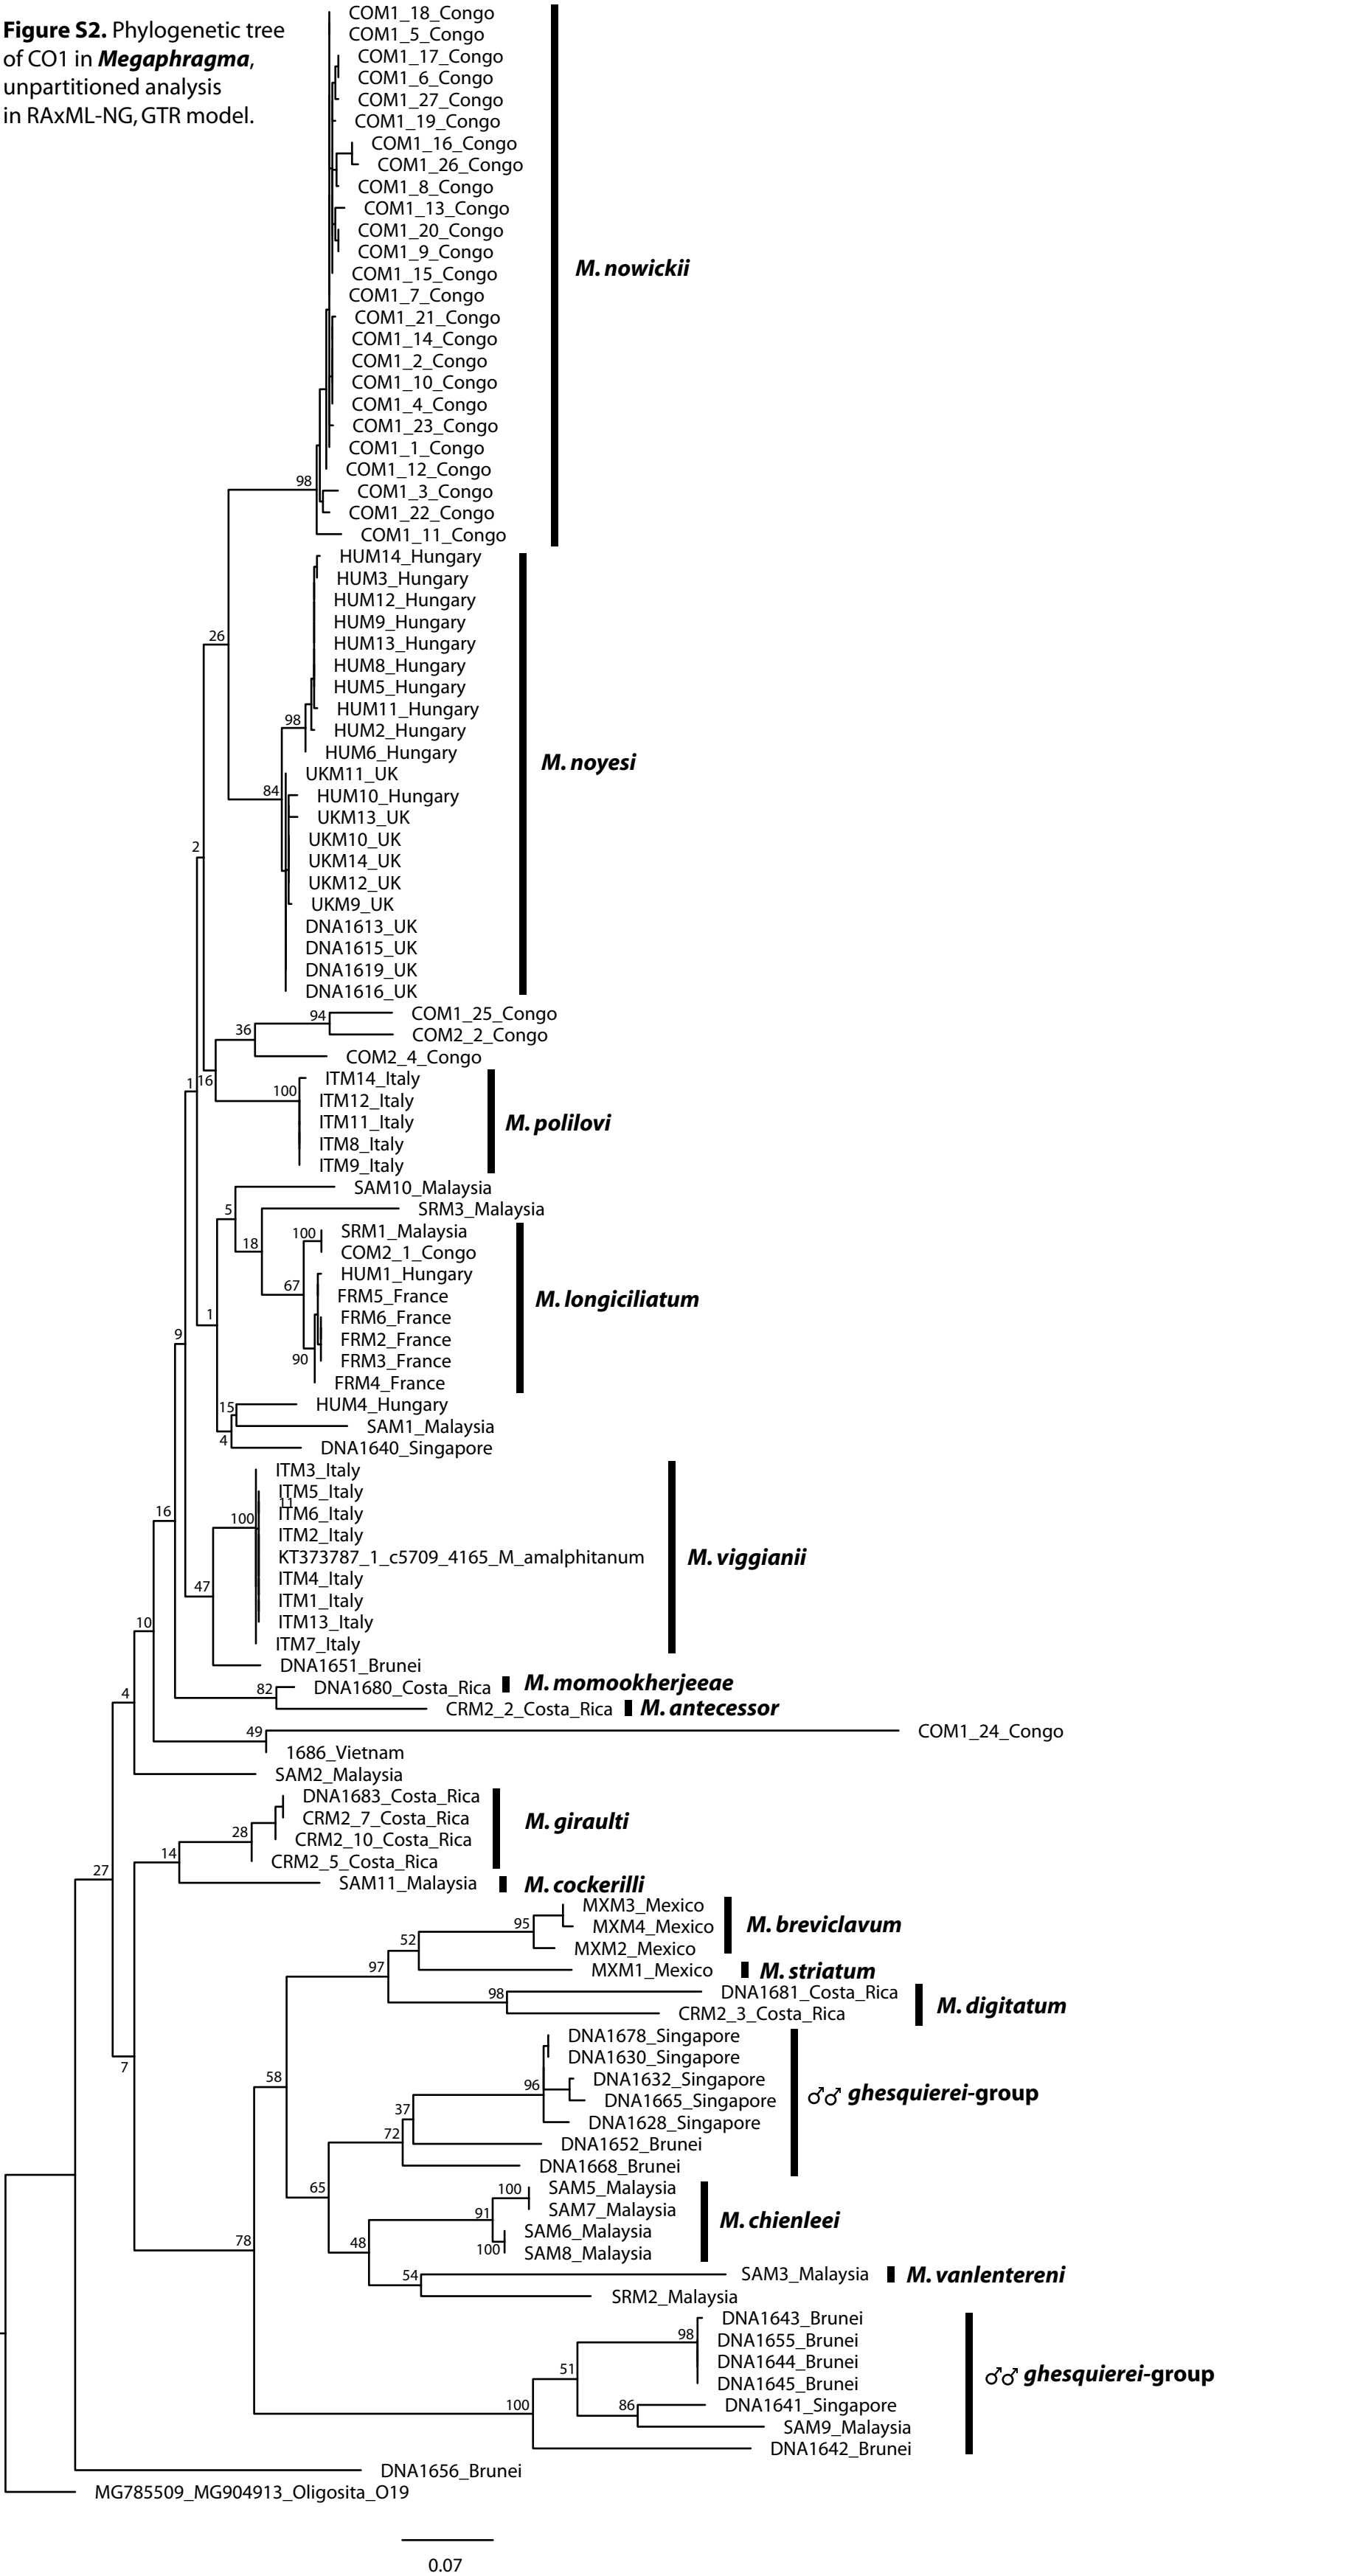

**Figure S3.** Phylogenetic tree of 28S in *Megaphragma*, unpartitioned analysis in RAxML-NG, K2P model.

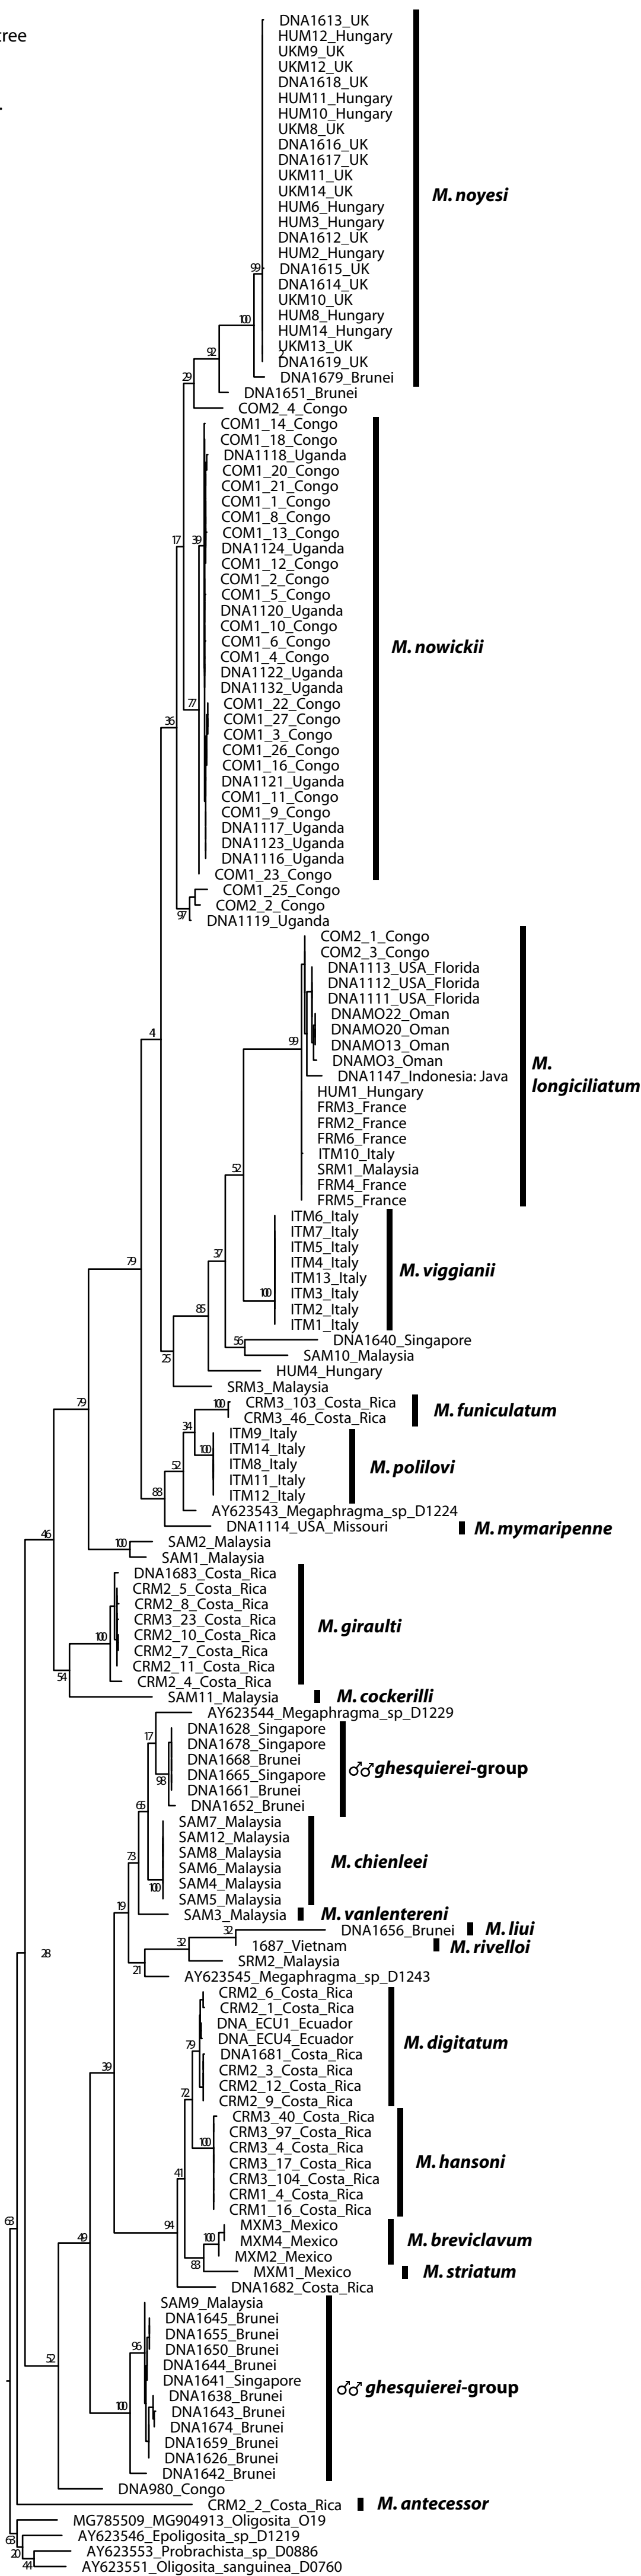



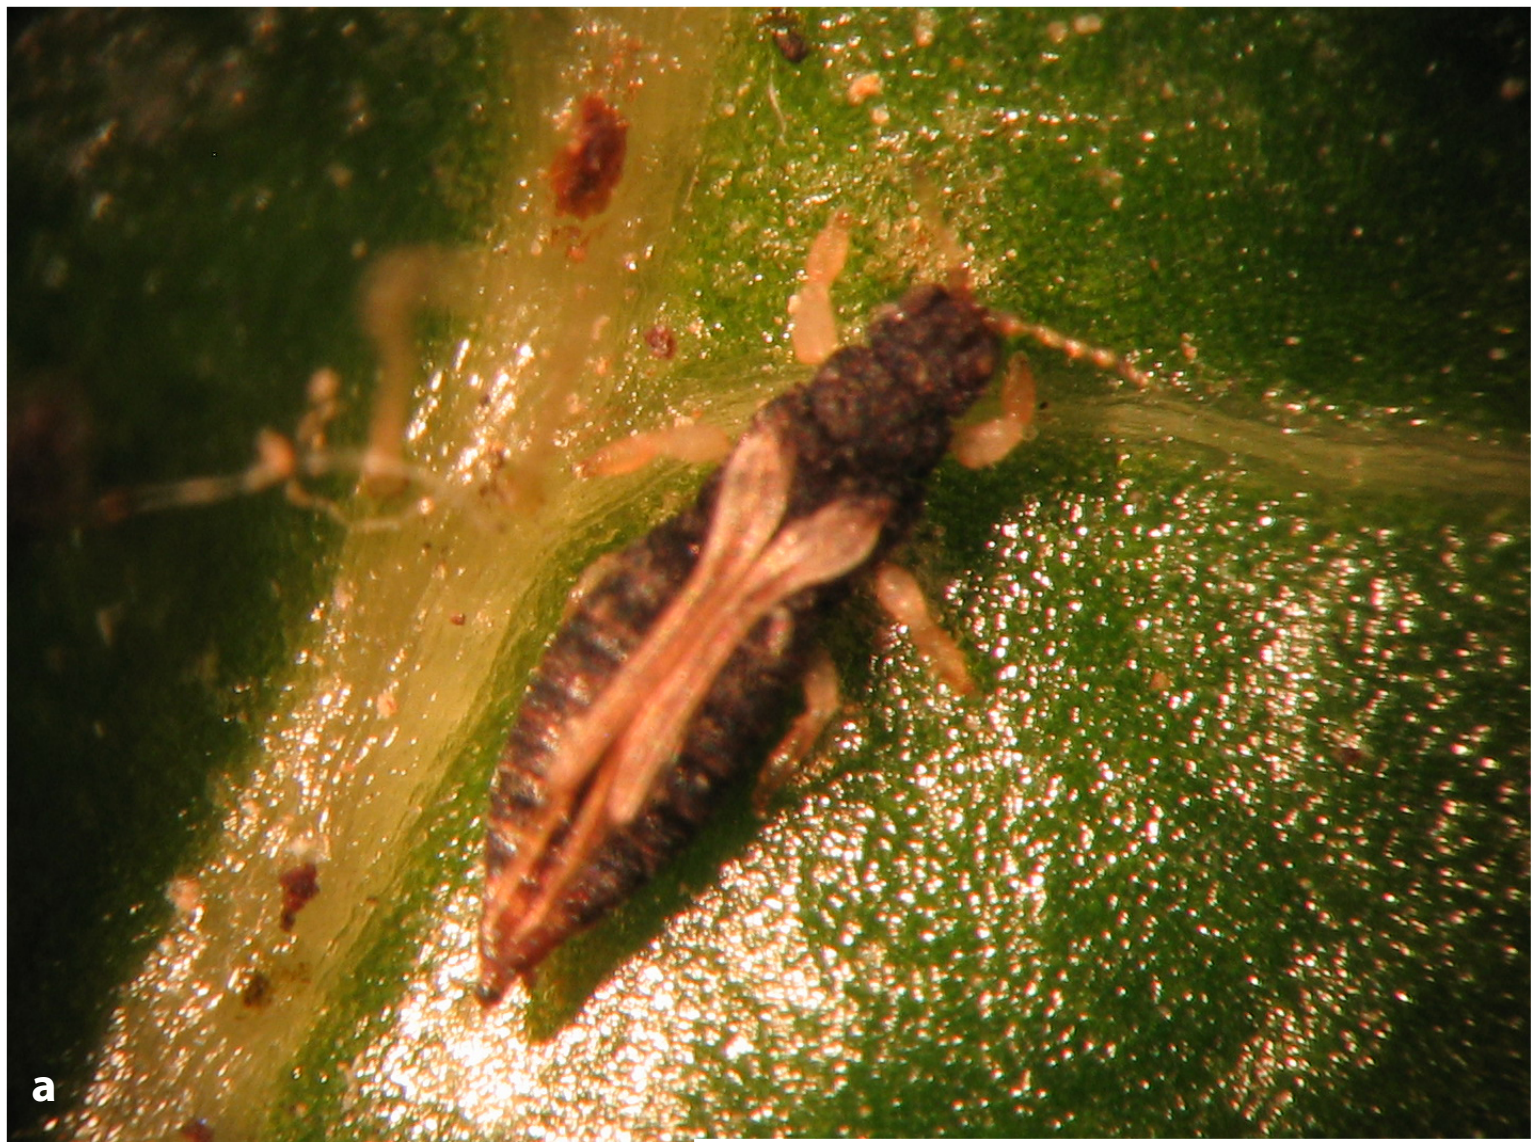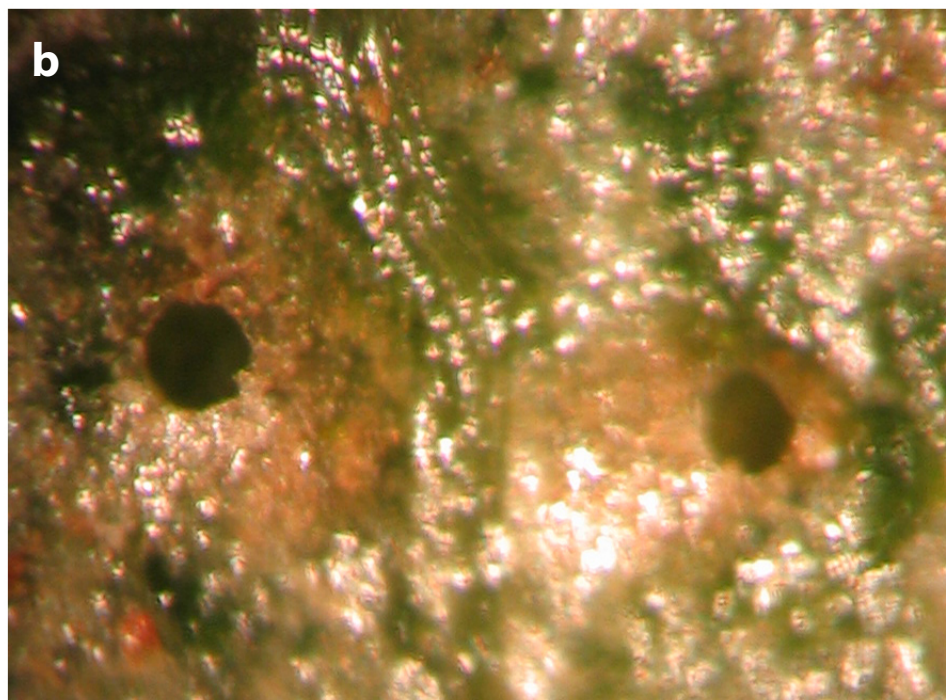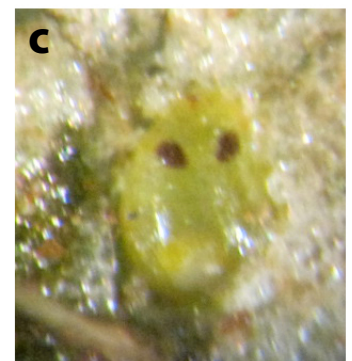

**Figure S4:** **a** *Heliothrips haemorrhoidalis*, the host of *Megaphragma* sp.,  
**b** eggs of *Heliothrips haemorrhoidalis* with exit hole of *Megaphragma* sp.,  
**c** pupa of *Megaphragma* sp. in egg of *Heliothrips haemorrhoidalis* (Photo G. Viggiani).
